# Supplementary material
Source: Springer Nature journal article supplement (https://www.springermedizin.de/resource/supplementary/12913_2010_1523_MOESM1_ESM.pdf/9529250)
Supplement: MOESM1 [file 9529250]

inclusion

high risk patients:

- 65+ years
- polypharmacy
- ATC A/ATC B
- non-adherence

randomisation

intervention group:  
- intervention GP

control group:  
- control GP

Intervention  
period

pharmaceutical anamnesis  
by the pharmacist  
t=0

usual care  
t = 0 - 12 months

pharmacotherapy review  
by the pharmacist  
t < 1 month

pharmaceutical care plan  
by GP + pharmacist  
t < 1 month

monitoring and follow up  
evaluation of pharmacotherapy  
by GP + pharmacist + practice nurse  
t = 3 months and t = 6 months

outcome

Hospital Admissions Related to Medication (HARM)  
survival  
ADE (Adverse Drug Events)  
quality of life (EQ5D/Visual Analogue Scale)  
t = 12 months
